# Supplementary material for: Improved Generation of Induced Pluripotent Stem Cells From Hair Derived Keratinocytes – A Tool to Study Neurodevelopmental Disorders as ADHD
Source: PubMed Central journal article supplement (PMC6167495; doi:10.3389/fncel.2018.00321), 2018-09-25
Supplement: Data_Sheet_1.pdf [file Data_Sheet_1.pdf]

1 **1 Supplementary material**

2

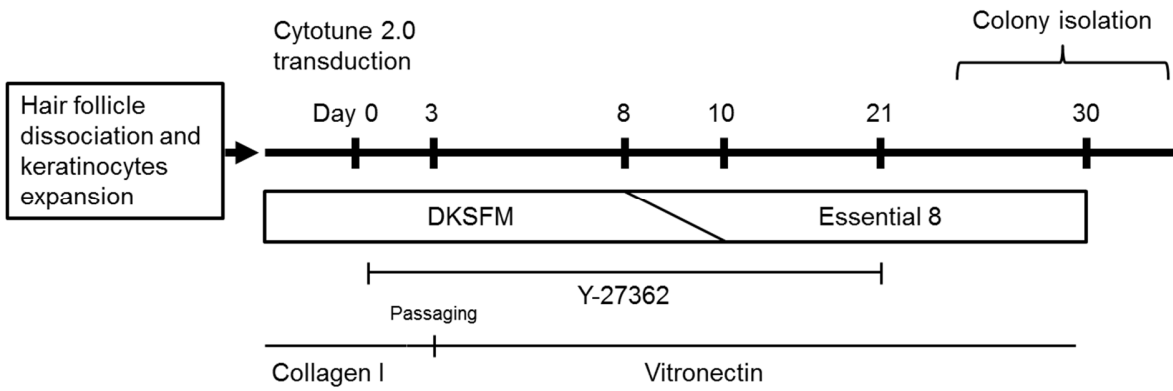

3

4 **Figure S 1:** Overview of the reprogramming of hair derived keratinocytes.

5

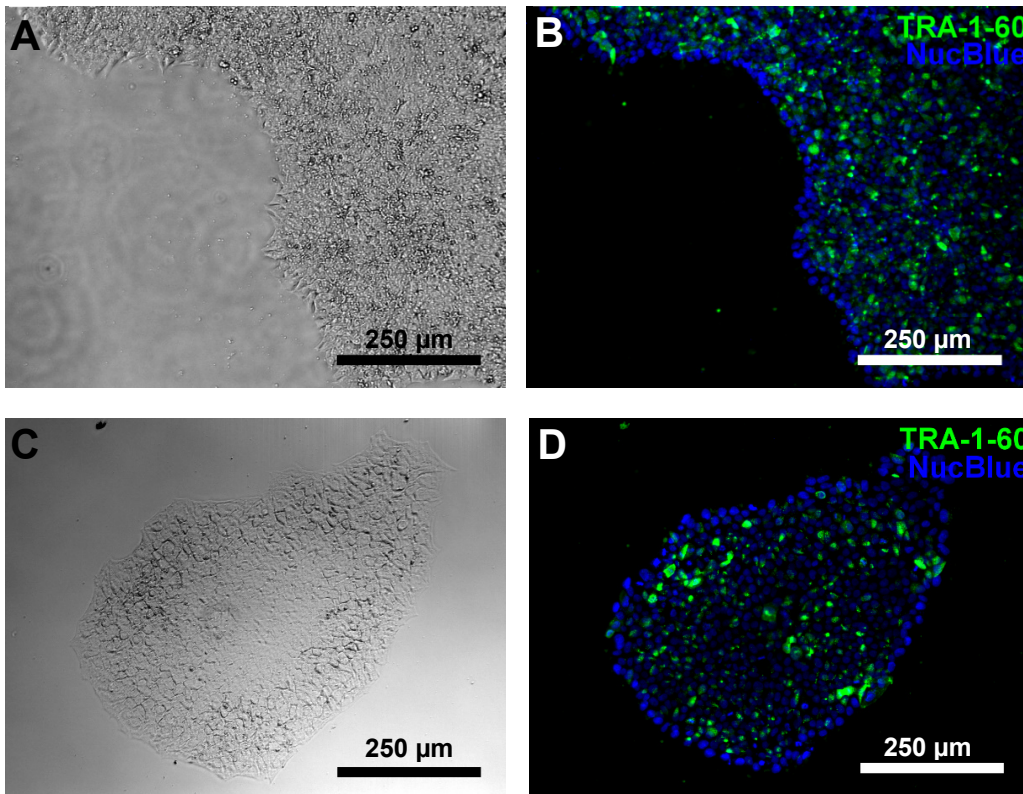

6

7

8 **Figure S 2:** Comparison between the generated iPSC line and the commercial iPSC line. (A) Phase  
 9 contrast image of a colony from the generated iPSC line. (B) TRA-1-60 (green) staining and nucleus  
 10 staining with NucBlue (blue) shows that generated iPSC line expresses the pluripotency marker. (C)  
 11 Phase contrast image of a colony from the commercial iPSC line. (D) TRA-1-60 (green) staining and

## iPSCs derived from follicular keratinocytes

12 nucleus staining with NucBlue (blue) shows that commercial iPSC line expresses the pluripotency  
13 marker.

14

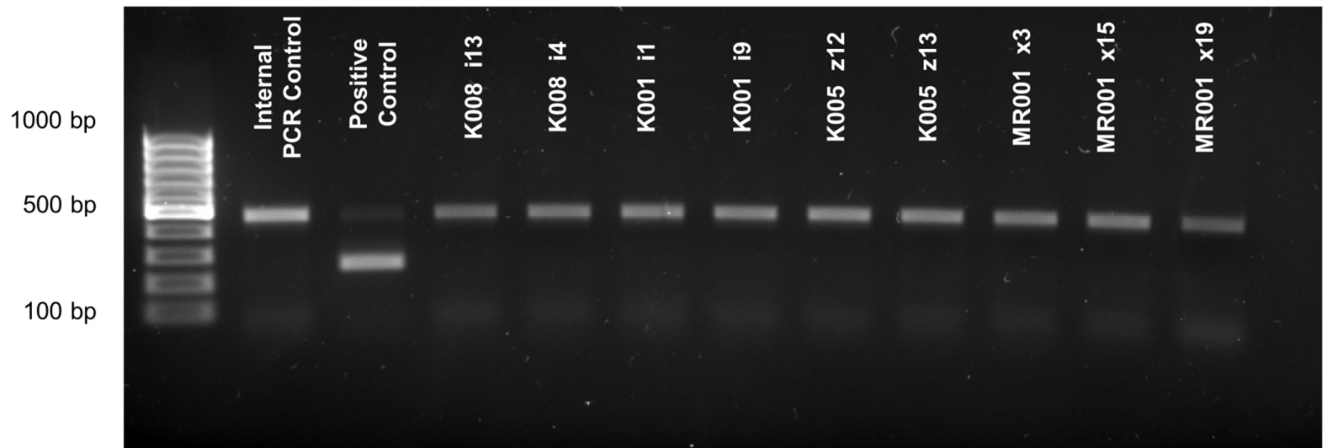

15

16 **Figure S 3:** Mycoplasma contamination assay. PCR products using the mycoplasma detection kit run  
17 on a 1.2% agarose gel. Mycoplasma genome in the tested samples was not detected, as indicated by  
18 the lack of a ca 260 bp band. The internal control band at ca 480 bp indicates a successfully performed  
19 reaction. K, control; MR, methylphenidate responder ADHD patient.

20

21 **Table S1:** Staining material used for the characterization of the neuronal cells.

| Product                                | Manufacturer | Cat. No  |
|----------------------------------------|--------------|----------|
| Fluoroshield Mounting Medium With DAPI | Abcam        | ab104139 |
| Goat anti-Mouse IgG Alexa Fluor 594    | Invitrogen   | A-11032  |
| Goat anti-Rabbit IgG Alexa Fluor 488   | Invitrogen   | A-11034  |
| Mouse anti-GFAP                        | SantaCruz    | sc-33673 |
| Rabbit anti-Tubulin $\beta$ 3 (TUBB3)  | BioLegend®   | 845501   |

22

23 **Table S2:** List of the primer used for the characterization of the various cell types.

| Gene Symbol   | Sequence (5' $\rightarrow$ 3')                      | Ann. Temp (°C) | Product Length (bp) | Melting Point Temp (°C) | Sequence Source           |
|---------------|-----------------------------------------------------|----------------|---------------------|-------------------------|---------------------------|
| <i>TERT</i>   | F: TGTC AAGGTGGATGTGACGG<br>R: GAGGAGCTCTGCTCGATGAC | 60             | 267                 | 88.0                    | Primer-BLAST              |
| <i>NES</i>    | F: CAAGATGTCCTCAGCCTGG<br>R: GGGGTCCTAGGGAATTGCAG   | 60             | 144                 | 86.5                    | Primer-BLAST              |
| <i>LIN28A</i> | F: AGCGCAGATCAAAGGAGACA<br>R: CCTCTCGAAAGTAGGTTGGCT | 60             | 189                 | 85.5                    | Primerbank:<br>94536796c2 |

**iPSCs derived from follicular keratinocytes**

|                                   |                                                                |      |     |      |                                        |
|-----------------------------------|----------------------------------------------------------------|------|-----|------|----------------------------------------|
| <b><i>PAX6</i></b>                | F: AACGATAACATACCAAGCGTGT<br>R: GGTCTGCCCGTTCAACATC            | 60   | 120 | 81.5 | PrimerBank ID<br>189083679c3           |
| <b><i>MAP2</i></b>                | F: CGAAGCGCCAATGGATTCC<br>R: TGAACTATCCTTGCAGACACCT            | 60   | 161 | 83.0 | PrimerBank ID<br>87578393c2            |
| <b><i>KRT14</i></b>               | According to manufacturer                                      | 60   | 76  | 79.0 | Qiagen 249900<br>(QT00052283)          |
| <b>Sendai<br/>Virus<br/>(SeV)</b> | F: GGATCACTAGGTGATATCGAGC<br>R: ACCAGACAAGAGTTTAAGAGATATGTATC  | 60   | 181 | 81.0 | CytoTune 2.0<br>manual<br>(Invitrogen) |
| <b><i>OCT3/4</i></b>              | F: GGA GGA AGC TGA CAA CAA TGA AA<br>R: GGC CTG CAC GAG GGT TT | 65   | 64  | 78.0 | Alonso-Barroso<br>et al., 2017         |
| <b><i>NANOG</i></b>               | F: TACCTCAGCCTCCAGCAGAT<br>R: CTTCTGCGTCACACCATTGC             | 58.4 | 150 | 82.0 | Primer-BLAST                           |
| <b><i>HMBS</i></b>                | According to manufacturer                                      | 60   | 107 | 83.5 | Qiagen 249900<br>(QT00014462)          |
| <b><i>ACTB</i></b>                | According to manufacturer                                      | 60   | 146 | 87.0 | Qiagen 249900<br>(QT00095431)          |
| <b><i>GAPDH</i></b>               | According to manufacturer                                      | 60   | 95  | 82.0 | Qiagen 249900<br>(QT00079247)          |

24

25

26 **Table S3:** Gene expression values and relative gene expression value (in %) calculated from the generated relative quantities from the  
 27 pluripotency markers qRT-PCR analysis

|                             | KRT14<br>(Mean±SEM) | % KRT14<br>Relative to<br>keratinocyte<br>(Mean±SEM) | LIN28A<br>(Mean±SEM) | % LIN28A<br>Relative to<br>commercial<br>hiPSC line<br>(Mean±SEM) | NANOG<br>(Mean±SEM) | % NANOG<br>Relative to<br>commercial<br>hiPSC line<br>(Mean±SEM) | OCT3/4<br>(Mean±SEM) | % OCT3/4<br>Relative to<br>commercial<br>hiPSC line<br>(Mean±SEM) | TERT<br>(Mean±SEM) | % TERT<br>Relative to<br>commercial<br>hiPSC line<br>(Mean±SEM) |
|-----------------------------|---------------------|------------------------------------------------------|----------------------|-------------------------------------------------------------------|---------------------|------------------------------------------------------------------|----------------------|-------------------------------------------------------------------|--------------------|-----------------------------------------------------------------|
| Keratinocytes               | 1.00±0.21           | 100±29.70                                            | 0.00±0               | 0.00±0                                                            | 0.00±0              | 0.00±0                                                           | 0.00±0               | 0.00±0                                                            | 0.00±0             | 0.00±0                                                          |
| hES control<br>line         | 0.00±0              | 0.00±0                                               | 2.15±0.13            | 191.96±18.32                                                      | 1.05±0.07           | 147.89±13.25                                                     | 1.64±0.07            | 147.75±14.80                                                      | 0.78±0.10          | 177.50±28.91                                                    |
| hiPSC<br>commercial<br>line | 0.00±0              | 0.00±0                                               | 1.12±0.08            | 100.00±10.49                                                      | 0.71±0.04           | 100.00±8.45                                                      | 1.11±0.10            | 100.00±12.87                                                      | 0.44±0.04          | 100.00±14.46                                                    |
| iPSC K001 i1                | 0.00±0              | 0.00±0                                               | 0.76±0.07            | 67.95±7.80                                                        | 0.83±0.04           | 116.90±9.33                                                      | 0.80±0.08            | 72.25±9.86                                                        | 3.57±0.13          | 811.36±88.08                                                    |
| iPSC K001 i9                | 0.00±0              | 0.00±0                                               | 0.60±0.03            | 53.30±4.78                                                        | 0.59±0.05           | 83.24±9.26                                                       | 0.93±0.04            | 83.96±8.42                                                        | 3.21±0.31          | 729.55±88.08                                                    |
| iPSC K005 z12               | 0.00±0              | 0.00±0                                               | 0.43±0.03            | 38.75±3.82                                                        | 0.30±0.02           | 42.54±4.08                                                       | 0.61±0.03            | 54.95±5.74                                                        | 0.30±0.05          | 68.64±12.59                                                     |
| iPSC K005 z13               | 0.00±0              | 0.00±0                                               | 0.59±0.03            | 52.68±4.79                                                        | 0.71±0.07           | 99.72±11.41                                                      | 0.90±0.08            | 81.08±10.26                                                       | 0.20±0.02          | 46.36±46.36                                                     |
| iPSC K008 i13               | 0.00±0              | 0.00±0                                               | 0.52±0.04            | 46.25±4.86                                                        | 0.56±0.04           | 79.15±6.98                                                       | 0.52±0.04            | 46.49±5.84                                                        | 0.40±0.05          | 90.45±15.01                                                     |
| iPSC K008 i4                | 0.00±0              | 0.00±0                                               | 2.68±0.31            | 239.29±32.88                                                      | 2.98±0.35           | 419.72±55.18                                                     | 1.41±0.19            | 127.03±20.88                                                      | 25.20±3.19         | 5727.27±932.05                                                  |
| iPSC MR001<br>x15           | 0.00±0              | 0.00±0                                               | 1.06±0.05            | 94.64±8.37                                                        | 1.88±0.16           | 264.79±27.76                                                     | 1.25±0.06            | 112.61±11.56                                                      | 0.77±0.11          | 174.55±31.28                                                    |
| iPSC MR001<br>x19           | 0.00±0              | 0.00±0                                               | 2.44±0.10            | 217.86±18.32                                                      | 4.06±0.42           | 571.83±68.43                                                     | 1.48±0.06            | 133.33±13.32                                                      | 0.54±0.09          | 121.82±23.18                                                    |
